# Supplementary material for: Native Wolbachia infection dynamics across Aedes albopictus (Diptera: Culicidae) populations in Hawai‘i
Source: Research Square preprint supplement (doi:10.21203/rs.3.rs-9715732/v1), 2026-06-10
Supplement: Supplementary file 1 [file 876acccedaaddfbc888ba222.xlsx]

## Sheet: Data
Sample ID	Sties	Island	wAlbA Presence	wAlbA Relative Density	wAlbB Presence	wAlbB Relative Density
Ab23KMR001	Hilo	Big Island			O	0.00530657
Ab24KMR001	Hilo	Big Island			O	1.03015
Ab23HLL001	Holualoa	Big Island			O	0.494546
Ab23HLL002	Holualoa	Big Island			O	0.750459
Ab23HLL003	Holualoa	Big Island			O	0.775032
Ab23HLL004	Holualoa	Big Island			O	0.249986
Ab23HLL005	Holualoa	Big Island	O	0.0148164	O	1.3076
Ab23HLL006	Holualoa	Big Island			O	0.502086
Ab23HLL007	Holualoa	Big Island			O	0.313932
Ab23HLL008	Holualoa	Big Island	O	0.0545001	O	0.794455
Ab23HLL009	Holualoa	Big Island			O	1.19729
Ab23HLL010	Holualoa	Big Island			O	2.31915
Ab23HLL011	Holualoa	Big Island			O	0.899794
Ab23HLL012	Holualoa	Big Island			O	0.196133
Ab23HLL013	Holualoa	Big Island			O	0.682412
Ab23HLL014	Holualoa	Big Island			O	0.542981
Ab23HLL015	Holualoa	Big Island			O	1.46272
Ab23HLL016	Holualoa	Big Island			O	0.658639
Ab23HLL017	Holualoa	Big Island			O	0.371797
Ab23KH003	Kawaihae	Big Island			O	0.391407
Ab23KWH001	Kawaihae	Big Island	O	0.0835342	O	1.65076
Ab23KWH002	Kawaihae	Big Island
Ab23KWH003	Kawaihae	Big Island			O	0.318276
Ab23KWH004	Kawaihae	Big Island	O	0.0664082	O	3.45173
Ab23KWH005	Kawaihae	Big Island			O	0.349982
Ab23KWH006	Kawaihae	Big Island			O	0.386879
Ab23KWH007	Kawaihae	Big Island			O	0.418219
Ab23KWH008	Kawaihae	Big Island			O	0.137978
Ab23KWH009	Kawaihae	Big Island			O	0.0976889
Ab23KWH010	Kawaihae	Big Island			O	0.240153
Ab23KWH011	Kawaihae	Big Island
Ab23KWH012	Kawaihae	Big Island			O	0.00860409
Ab23KWH013	Kawaihae	Big Island			O	0.450553
Ab23KWH014	Kawaihae	Big Island
Ab23KWH015	Kawaihae	Big Island			O	0.199831
Ab23KWH016	Kawaihae	Big Island	O	0.0337607	O	0.142927
Ab23KWH017	Kawaihae	Big Island			O	0.0794807
Ab23ML001	Miloli'i	Big Island			O	0.0840145
Ab23MLL001	Miloli'i	Big Island	O	0.0902338	O	0.0349376
Ab23MLL002	Miloli'i	Big Island
Ab23MLL003	Miloli'i	Big Island	O	0.011149	O	0.0707887
Ab23MLL004	Miloli'i	Big Island	O	0.0611989	O	0.11065
Ab23MLL005	Miloli'i	Big Island	O	0.00958827	O	0.0184235
Ab23MLL006	Miloli'i	Big Island			O	7.90192
Ab23MLL007	Miloli'i	Big Island	O	0.0329502	O	0.714676
Ab23MLL008	Miloli'i	Big Island			O	0.885545
Ab23MLL009	Miloli'i	Big Island			O	0.994281
Ab23MLL010	Miloli'i	Big Island			O	0.588899
Ab23MLL011	Miloli'i	Big Island	O	0.00311864	O	0.586186
Ab23MLL012	Miloli'i	Big Island			O	0.249196
Ab23MLL013	Miloli'i	Big Island	O	0.02033	O	0.32258
Ab23MLL014	Miloli'i	Big Island			O	0.530907
Ab23MLL015	Miloli'i	Big Island	O	0.0164301	O	1.11715
Ab23MLL016	Miloli'i	Big Island	O	0.0247369	O	0.847857
Ab23MLL017	Miloli'i	Big Island	O	0.179156	O	0.916247
Ab23MLL018	Miloli'i	Big Island			O	1.25439
Ab23MLL019	Miloli'i	Big Island	O	0.10437	O	1.39408
Ab23MLL020	Miloli'i	Big Island			O	0.634824
Ab23MLL021	Miloli'i	Big Island			O	0.127729
Ab23MLL022	Miloli'i	Big Island			O	2.33327
Ab23MLL023	Miloli'i	Big Island			O	0.284109
Ab23MLL024	Miloli'i	Big Island			O	3.20126
Ab23MLL025	Miloli'i	Big Island			O	1.81515
Ab23MLL026	Miloli'i	Big Island			O	0.742428
Ab23MLL027	Miloli'i	Big Island			O	0.209182
Ab23MLL028	Miloli'i	Big Island			O	1.94174
Ab23MLL029	Miloli'i	Big Island			O	1.10026
Ab23MLL030	Miloli'i	Big Island			O	0.0530971
Ab23MLL032	Miloli'i	Big Island			O	0.307526
Ab23MLL033	Miloli'i	Big Island			O	0.270669
Ab23AMR001	Aliamanu Military Reservation	Oahu			O	1.3289
Ab23AMR001_1	Aliamanu Military Reservation	Oahu	O	0.246357	O	1.27512
Ab23AMR002	Aliamanu Military Reservation	Oahu	O	0.0827579	O	0.375381
Ab23AMR002_1	Aliamanu Military Reservation	Oahu	O	0.0659661	O	0.421866
Ab23AMR003	Aliamanu Military Reservation	Oahu			O	0.313013
Ab23AMR004	Aliamanu Military Reservation	Oahu			O	0.695947
Ab23AMR005	Aliamanu Military Reservation	Oahu	O	0.0413211	O	0.659665
Ab23AMR006	Aliamanu Military Reservation	Oahu	O	0.0520941	O	0.499131
Ab23AMR008	Aliamanu Military Reservation	Oahu	O	0.0780933	O	1.17392
Ab23AMR009	Aliamanu Military Reservation	Oahu			O	0.163453
Ab23AMR010	Aliamanu Military Reservation	Oahu			O	0.298339
Ab23AMR011	Aliamanu Military Reservation	Oahu			O	1.0453
Ab23AMR012	Aliamanu Military Reservation	Oahu			O	0.330019
Ab23AMR013	Aliamanu Military Reservation	Oahu			O	0.0508594
Ab23AMR014	Aliamanu Military Reservation	Oahu			O	0.0958832
Ab23AMR015	Aliamanu Military Reservation	Oahu			O	0.307408
Ab23AMR016	Aliamanu Military Reservation	Oahu			O	0.657117
Ab23FS001	Fort Shafter	Oahu	O	0.0409179	O	0.699331
Ab23FS002	Fort Shafter	Oahu	O	0.0628883	O	1.84867
Ab23FS003	Fort Shafter	Oahu	O	0.0808948	O	0.994499
Ab23FS004	Fort Shafter	Oahu	O	0.0726662	O	4.64108
Ab23FS005	Fort Shafter	Oahu	O	0.0337257	O	1.49154
Ab23FS006	Fort Shafter	Oahu	O	0.0455921	O	1.46575
Ab23FS007	Fort Shafter	Oahu	O	0.0385171	O	0.609642
Ab23FS008	Fort Shafter	Oahu	O	0.0595798	O	1.22185
Ab23FS009	Fort Shafter	Oahu	O	0.0107025	O	0.68294
Ab23FS010	Fort Shafter	Oahu	O	0.0797876	O	1.31938
Ab23FS011	Fort Shafter	Oahu			O	0.425566
Ab23FS012	Fort Shafter	Oahu			O	0.281513
Ab23FS013	Fort Shafter	Oahu			O	1.06009
Ab23FS014	Fort Shafter	Oahu			O	0.529567
Ab23FS015	Fort Shafter	Oahu			O	0.236078
Ab23FS016	Fort Shafter	Oahu	O	0.00405736	O	0.333046
Ab23FS017	Fort Shafter	Oahu			O	0.231186
Ab23FS018	Fort Shafter	Oahu			O	0.136995
Ab23FS019	Fort Shafter	Oahu			O	0.278331
Ab23FS020	Fort Shafter	Oahu			O	0.368157
Ab23FS021	Fort Shafter	Oahu	O	0.127597	O	2.82405
Ab23FS022	Fort Shafter	Oahu	O	0.199194	O	1.2844
Ab23FS023	Fort Shafter	Oahu	O	0.139117	O	1.12212
Ab23FS024	Fort Shafter	Oahu	O	0.18051	O	1.67905
Ab23FS025	Fort Shafter	Oahu	O	0.0259564	O	0.386237
Ab23FS026	Fort Shafter	Oahu	O	0.139117	O	1.63074
Ab23FS027	Fort Shafter	Oahu	O	0.0154468	O	0.309011
Ab23FS028	Fort Shafter	Oahu	O	0.0207708	O	0.383927
Ab23FS029	Fort Shafter	Oahu			O	0.230058
Ab23FS030	Fort Shafter	Oahu			O	0.147608
Ab23FS031	Fort Shafter	Oahu			O	0.2524
Ab23FS032	Fort Shafter	Oahu			O	0.810395
Ab23FS033	Fort Shafter	Oahu	O	0.00289155	O	0.261043
Ab23FS034	Fort Shafter	Oahu			O	0.436132
Ab23FS035	Fort Shafter	Oahu			O	0.659025
Ab23FS036	Fort Shafter	Oahu			O	0.296656
Ab23FS037	Fort Shafter	Oahu			O	0.376739
Ab23FS038	Fort Shafter	Oahu	O	0.108263	O	1.57843
Ab23FS039	Fort Shafter	Oahu	O	0.122843	O	1.06931
Ab23FS040	Fort Shafter	Oahu	O	0.0160154	O	1.27989
Ab23FS041	Fort Shafter	Oahu	O	0.0501781	O	0.952891
Ab23FS042	Fort Shafter	Oahu			O	0.2335
Ab23FS043	Fort Shafter	Oahu	O	0.0317247	O	0.908156
Ab23FS044	Fort Shafter	Oahu	O	0.0263546	O	0.896609
Ab23FS045	Fort Shafter	Oahu			O	1.14085
Ab23FS046	Fort Shafter	Oahu			O	0.254226
Ab23FS047	Fort Shafter	Oahu	O	0.0415761	O	0.842756
Ab23FS048	Fort Shafter	Oahu			O	0.468088
Ab23FS049	Fort Shafter	Oahu	O	0.0788388	O	0.427113
Ab23FS050	Fort Shafter	Oahu	O	0.0672718	O	0.558226
Ab23FS051	Fort Shafter	Oahu	O	0.0914162	O	1.61725
Ab23FS052	Fort Shafter	Oahu			O	0.148338
Ab23FS053	Fort Shafter	Oahu			O	0.671273
Ab23FS054	Fort Shafter	Oahu			O	0.539753
Ab23FS055	Fort Shafter	Oahu	O	0.0561304	O	0.762238
Ab23FS056	Fort Shafter	Oahu	O	0.0400585	O	1.08506
Ab23FS057	Fort Shafter	Oahu			O	0.205101
Ab23FS058	Fort Shafter	Oahu			O	0.151334
Ab23FS059	Fort Shafter	Oahu			O	0.285268
Ab23FS060	Fort Shafter	Oahu			O	0.156256
Ab23FS061	Fort Shafter	Oahu	O	0.00483355	O	0.28857
Ab23FS062	Fort Shafter	Oahu			O	0.161019
Ab23HMR001	Helemano	Oahu			O	1.03732
Ab23HMR002	Helemano	Oahu			O	1.89251
Ab23HMR003	Helemano	Oahu			O	5.32183
Ab23HMR004	Helemano	Oahu			O	0.667796
Ab23HMR005	Helemano	Oahu			O	1.02025
Ab23HMR006	Helemano	Oahu			O	0.0933603
Ab23HMR007	Helemano	Oahu			O	0.213969
Ab24MCG001	Mānoa	Oahu			O	0.526495
Ab24MCG002	Mānoa	Oahu			O	0.572167
Ab24MCG003	Mānoa	Oahu			O	0.569504
Ab24MCG004	Mānoa	Oahu			O	0.5253
Ab24MCG005	Mānoa	Oahu			O	0.480822
Ab24MCG006	Mānoa	Oahu			O	0.696018
Ab24MCG007	Mānoa	Oahu			O	0.306486
Ab24MCG008	Mānoa	Oahu			O	0.125336
Ab24MCG009	Mānoa	Oahu			O	1.42687
Ab24MCG010	Mānoa	Oahu			O	0.372781
Ab24MCG011	Mānoa	Oahu			O	3.78035
Ab24MCG012	Mānoa	Oahu			O	0.237957
Ab23ERTA001	Mililani Mauka	Oahu			O	1.12013
Ab23ERTA002	Mililani Mauka	Oahu			O	0.318418
Ab23ERTA003	Mililani Mauka	Oahu			O	0.747249
Ab23ERTA004	Mililani Mauka	Oahu			O	2.0893
Ab23ERTA005	Mililani Mauka	Oahu	O	0.053638	O	0.279717
Ab23ERTA007	Mililani Mauka	Oahu	O	0.0832851	O	0.280119
Ab23ERTA009	Mililani Mauka	Oahu	O	0.075588	O	0.729554
Ab23ERTA010	Mililani Mauka	Oahu			O	2.23902
Ab23ERTA012	Mililani Mauka	Oahu	O	0.377865	O	0.701771
Ab23ERTA017	Mililani Mauka	Oahu			O	0.584769
Ab23ERTA019	Mililani Mauka	Oahu	O	0.066166	O	0.548641
Ab23ERTA020	Mililani Mauka	Oahu	O	0.0752777	O	1.71272
Ab23ERTA021	Mililani Mauka	Oahu	O	0.0537271	O	1.33951
Ab23ERTA022	Mililani Mauka	Oahu	O	0.0304312	O	0.369719
Ab23ERTA023	Mililani Mauka	Oahu	O	0.0884559	O	0.76615
Ab23ERTA024	Mililani Mauka	Oahu			O	0.529414
Ab23ERTA025	Mililani Mauka	Oahu			O	0.285989
Ab23ERTA026	Mililani Mauka	Oahu	O	0.0137798	O	0.816887
Ab23ERTA027	Mililani Mauka	Oahu			O	0.281087
Ab23ERTA028	Mililani Mauka	Oahu	O	0.00475317	O	0.280699
Ab23ERTA029	Mililani Mauka	Oahu	O	0.012582	O	0.107972
Ab23ERTA030	Mililani Mauka	Oahu			O	0.395374
Ab23ERTA031	Mililani Mauka	Oahu			O	0.15415
Ab23ERTA032	Mililani Mauka	Oahu			O	0.220774
Ab23ERTA033	Mililani Mauka	Oahu			O	0.653467
Ab23ERTA034	Mililani Mauka	Oahu			O	0.217719
Ab23ERTA035	Mililani Mauka	Oahu			O	0.204003
Ab23ERTA036	Mililani Mauka	Oahu			O	0.362462
Ab23ERTA037	Mililani Mauka	Oahu			O	0.230468
Ab23ERTA038	Mililani Mauka	Oahu			O	0.503258
Ab23ERTA039	Mililani Mauka	Oahu			O	0.23405
Ab23ERTA040	Mililani Mauka	Oahu			O	0.289889
Ab23ERTA041	Mililani Mauka	Oahu			O	0.11399
Ab23ERTA043	Mililani Mauka	Oahu			O	0.260243
Ab23ERTA044	Mililani Mauka	Oahu			O	0.475866
Ab23ERTA045	Mililani Mauka	Oahu			O	0.243942
Ab23ERTA046	Mililani Mauka	Oahu			O	0.458078
Ab23ERTA047	Mililani Mauka	Oahu			O	0.185968
Ab23ERTA048	Mililani Mauka	Oahu			O	0.0916219
Ab23ERTA049	Mililani Mauka	Oahu	O	0.0114561	O	0.245494
Ab23ERTA050	Mililani Mauka	Oahu			O	0.206594
Ab23ERTA051	Mililani Mauka	Oahu			O	0.0583336
Ab23ERTA052	Mililani Mauka	Oahu	O	0.0895974	O	1.82046
Ab23ERTA053	Mililani Mauka	Oahu	O	0.311428	O	1.93803
Ab23ERTA054	Mililani Mauka	Oahu
Ab23ERTA055	Mililani Mauka	Oahu			O	0.584104
Ab23ERTA056	Mililani Mauka	Oahu			O	0.143823
Ab23ERTA057	Mililani Mauka	Oahu			O	0.425229
Ab23ERTA058	Mililani Mauka	Oahu			O	0.600228
Ab23SB001	Schofield Barracks	Oahu	O	0.122769	O	1.23389
Ab23SB002	Schofield Barracks	Oahu	O	0.0585049	O	0.733822
Ab23SB003	Schofield Barracks	Oahu			O	0.027
Ab23SB004	Schofield Barracks	Oahu	O	0.0189031	O	0.689521
Ab23SB005	Schofield Barracks	Oahu			O	0.0328945
Ab23SB006	Schofield Barracks	Oahu	O	0.0820375	O	0.95174
Ab23SB007	Schofield Barracks	Oahu			O	0.357326
Ab23SB008	Schofield Barracks	Oahu			O	0.214876
Ab23SB009	Schofield Barracks	Oahu			O	0.214164
Ab23SB010	Schofield Barracks	Oahu			O	0.126267
Ab23SB011	Schofield Barracks	Oahu			O	0.12212
Ab23SB013	Schofield Barracks	Oahu	O	0.223403	O	2.11687
Ab23SB014	Schofield Barracks	Oahu	O	0.0327059	O	1.09303
Ab23SB015	Schofield Barracks	Oahu	O	0.1155	O	1.77483
Ab23SB016	Schofield Barracks	Oahu	O	0.0318888	O	0.494236
Ab23SB017	Schofield Barracks	Oahu			O	0.421574
Ab23SB018	Schofield Barracks	Oahu			O	0.387982
Ab23SB019	Schofield Barracks	Oahu			O	0.635455
Ab23SB020	Schofield Barracks	Oahu			O	1.56528
Ab23SB021	Schofield Barracks	Oahu			O	0.45359
Ab23SB022	Schofield Barracks	Oahu			O	0.186523
Ab23SB023	Schofield Barracks	Oahu			O	0.673889
Ab23SB024	Schofield Barracks	Oahu			O	0.459259
Ab23SB025	Schofield Barracks	Oahu			O	0.47343
Ab23SB026	Schofield Barracks	Oahu			O	0.781204
Ab23SB027	Schofield Barracks	Oahu			O	0.0833512
Ab23TAMC001	Tripler Army Medical Center	Oahu			O	0.877642
Ab23TAMC002	Tripler Army Medical Center	Oahu	O	0.019101	O	0.696242
Ab23TAMC003	Tripler Army Medical Center	Oahu			O	0.536794
Ab23TAMC004	Tripler Army Medical Center	Oahu	O	0.282285	O	0.5885
Ab23TAMC005	Tripler Army Medical Center	Oahu	O	0.277091	O	0.457401
Ab23TAMC006	Tripler Army Medical Center	Oahu	O	0.156603	O	0.689368
Ab23TAMC007	Tripler Army Medical Center	Oahu	O	0.147456	O	0.392075
Ab23TAMC008	Tripler Army Medical Center	Oahu	O	0.0171881	O	1.81427
Ab23TAMC009	Tripler Army Medical Center	Oahu	O	0.0409811	O	0.476211
Ab23TAMC010	Tripler Army Medical Center	Oahu			O	0.869142
Ab23TAMC011	Tripler Army Medical Center	Oahu			O	1.11848
Ab23TAMC012	Tripler Army Medical Center	Oahu			O	0.130902
Ab23TAMC013	Tripler Army Medical Center	Oahu			O	0.598636
Ab23TAMC014	Tripler Army Medical Center	Oahu			O	0.48416
Ab23TAMC015	Tripler Army Medical Center	Oahu			O	0.830767
Ab23TAMC016	Tripler Army Medical Center	Oahu			O	0.771931
Ab23TAMC017	Tripler Army Medical Center	Oahu			O	0.378842
Ab23TAMC018	Tripler Army Medical Center	Oahu	O	0.0112944	O	0.253571
Ab23TAMC019	Tripler Army Medical Center	Oahu			O	0.482719
Ab23TAMC020	Tripler Army Medical Center	Oahu			O	0.486368
Ab23TAMC021	Tripler Army Medical Center	Oahu			O	0.00730035
Ab23TAMC022	Tripler Army Medical Center	Oahu			O	0.264581
Ab23TAMC023	Tripler Army Medical Center	Oahu	O	0.317636	O	1.20308
Ab23TAMC024	Tripler Army Medical Center	Oahu			O	0.192384
Ab23TAMC025	Tripler Army Medical Center	Oahu	O	0.0698242	O	0.172316
Ab23TAMC026	Tripler Army Medical Center	Oahu			O	0.264801
Ab23TAMC027	Tripler Army Medical Center	Oahu			O	0.522752
Ab23TAMC028	Tripler Army Medical Center	Oahu	O	0.00458829	O	0.0756029
Ab23TAMC029	Tripler Army Medical Center	Oahu			O	0.603713
Ab23TAMC030	Tripler Army Medical Center	Oahu			O	0.366461
Ab23TAMC031	Tripler Army Medical Center	Oahu			O	0.538801
Ab23TAMC032	Tripler Army Medical Center	Oahu			O	0.274917
Ab23TAMC033	Tripler Army Medical Center	Oahu			O	0.1678
Ab23TAMC034	Tripler Army Medical Center	Oahu			O	0.505006
Ab23TAMC035	Tripler Army Medical Center	Oahu			O	0.0521329
Ab23TAMC036	Tripler Army Medical Center	Oahu			O	0.411385
Ab23TAMC037	Tripler Army Medical Center	Oahu	O	0.073119	O	0.557652
Ab23TAMC038	Tripler Army Medical Center	Oahu			O	0.20489
Ab23TAMC039	Tripler Army Medical Center	Oahu			O	0.0996315
Ab23TAMC040	Tripler Army Medical Center	Oahu			O	0.0800297
Ab23TAMC041	Tripler Army Medical Center	Oahu			O	0.0997753
Ab23TAMC042	Tripler Army Medical Center	Oahu			O	1.97944
Ab23TAMC043	Tripler Army Medical Center	Oahu			O	1.67702
Ab23TAMC044	Tripler Army Medical Center	Oahu			O	0.355351
Ab23TAMC045	Tripler Army Medical Center	Oahu	O	0.00776483	O	0.237141
Ab23TAMC046	Tripler Army Medical Center	Oahu	O	0.767587	O	1.09766
Ab23TAMC047	Tripler Army Medical Center	Oahu	O	0.0102621	O	2.76308
Ab23TAMC048	Tripler Army Medical Center	Oahu			O	0.951508
Ab23TAMC049	Tripler Army Medical Center	Oahu			O	0.937237
Ab23TAMC050	Tripler Army Medical Center	Oahu			O	0.840842
Ab23TAMC051	Tripler Army Medical Center	Oahu			O	0.708488
Ab23TAMC052	Tripler Army Medical Center	Oahu			O	0.0802997
Ab23TAMC053	Tripler Army Medical Center	Oahu			O	0.134394
Ab23TAMC054	Tripler Army Medical Center	Oahu			O	0.30542
Ab23TAMC055	Tripler Army Medical Center	Oahu			O	0.282052
Ab23TAMC056	Tripler Army Medical Center	Oahu			O	0.158814
Ab23TAMC057	Tripler Army Medical Center	Oahu			O	0.0692338
Ab23TAMC058	Tripler Army Medical Center	Oahu			O	0.387996
Ab23TAMC059	Tripler Army Medical Center	Oahu			O	0.0207211
Ab23TAMC060	Tripler Army Medical Center	Oahu			O	0.0509242
Ab23TAMC061	Tripler Army Medical Center	Oahu	O	0.832519	O	0.755379
Ab23TAMC062	Tripler Army Medical Center	Oahu			O	0.878067
Ab23TAMC063	Tripler Army Medical Center	Oahu	O	0.062439	O	0.618394
Ab23TAMC064	Tripler Army Medical Center	Oahu	O	0.00481167	O	0.159441
Ab23TAMC065	Tripler Army Medical Center	Oahu			O	0.528176
Ab23TAMC066	Tripler Army Medical Center	Oahu			O	0.922132
Ab23TAMC067	Tripler Army Medical Center	Oahu			O	0.817565
Ab23TAMC068	Tripler Army Medical Center	Oahu	O	0.0161364	O	0.174659
Ab23TAMC069	Tripler Army Medical Center	Oahu			O	1.66352
Ab23TAMC070	Tripler Army Medical Center	Oahu			O	1.02694
Ab23TAMC071	Tripler Army Medical Center	Oahu			O	1.58461
Ab23TAMC072	Tripler Army Medical Center	Oahu	O	0.0206719	O	1.06177
Ab23TAMC073	Tripler Army Medical Center	Oahu			O	0.42844
Ab23TAMC074	Tripler Army Medical Center	Oahu			O	0.28691
Ab23TAMC075	Tripler Army Medical Center	Oahu			O	0.654022
Ab23TAMC076	Tripler Army Medical Center	Oahu			O	0.0571485
Ab23TAMC077	Tripler Army Medical Center	Oahu			O	0.224281
Ab23TAMC078	Tripler Army Medical Center	Oahu			O	0.0829686
Ab23TAMC079	Tripler Army Medical Center	Oahu			O	0.370563
Ab23TAMC080	Tripler Army Medical Center	Oahu			O	0.125453
Ab23TAMC081	Tripler Army Medical Center	Oahu			O	0.172509
Ab23TAMC082	Tripler Army Medical Center	Oahu			O	0.134247
Ab23TAMC083	Tripler Army Medical Center	Oahu			O	0.088753
Ab23TAMC084	Tripler Army Medical Center	Oahu			O	0.113655
Ab23TAMC085	Tripler Army Medical Center	Oahu			O	0.13961
Ab23TAMC086	Tripler Army Medical Center	Oahu			O	0.0661219
Ab23TAMC087	Tripler Army Medical Center	Oahu			O	0.369832
Ab23TAMC088	Tripler Army Medical Center	Oahu	O	0.0356457	O	2.2735
Ab23TAMC089	Tripler Army Medical Center	Oahu			O	0.558778
Ab23TAMC090	Tripler Army Medical Center	Oahu			O	0.151175
Ab23TAMC091	Tripler Army Medical Center	Oahu			O	0.116865
Ab23TMC001	Tripler Army Medical Center	Oahu	O	0.0116336	O	0.329931
Ab23TMC002	Tripler Army Medical Center	Oahu			O	0.497773
Ab23TMC003	Tripler Army Medical Center	Oahu	O	0.0456767	O	0.380302
Ab23TMC004	Tripler Army Medical Center	Oahu	O	0.0898323	O	0.738078
Ab23TMC005	Tripler Army Medical Center	Oahu	O	0.00563668	O	0.582933
Ab23TMC006	Tripler Army Medical Center	Oahu			O	0.556772
Ab23TMC007	Tripler Army Medical Center	Oahu	O	0.0116841	O	0.333406
Ab23TMC008	Tripler Army Medical Center	Oahu	O	0.044762	O	0.172522
Ab23TMC009	Tripler Army Medical Center	Oahu	O	0.0226056	O	0.681759
Ab23TMC010	Tripler Army Medical Center	Oahu	O	0.0342861	O	1.73598
Ab24TMC011	Tripler Army Medical Center	Oahu			O	0.937563
Ab24TMC012	Tripler Army Medical Center	Oahu			O	0.116724
Ab24TMC013	Tripler Army Medical Center	Oahu			O	0.621249
Ab24TMC014	Tripler Army Medical Center	Oahu			O	1.99911
Ab24TMC015	Tripler Army Medical Center	Oahu			O	0.163519
Ab24TMC016	Tripler Army Medical Center	Oahu			O	0.309012
Ab24TMC017	Tripler Army Medical Center	Oahu			O	1.00094
Ab24TMC-F001	Tripler Army Medical Center	Oahu			O	2.05225
Ab24TMC-F002	Tripler Army Medical Center	Oahu			O	2.34145
Ab24TMC-F003	Tripler Army Medical Center	Oahu			O	0.711763
Ab24TMC-F004	Tripler Army Medical Center	Oahu			O	0.338242
Ab24TMC-F005	Tripler Army Medical Center	Oahu			O	0.297798
Ab24TMC-F006	Tripler Army Medical Center	Oahu			O	0.134381
Ab24TMC-S001	Tripler Army Medical Center	Oahu	O	0.0191564	O	0.279059
Ab24TMC-S002	Tripler Army Medical Center	Oahu			O	0.0827128
Ab24TMC-S003	Tripler Army Medical Center	Oahu			O	0.173653
Ab24TMC-S004	Tripler Army Medical Center	Oahu			O	0.686038
Ab24TMC-S005	Tripler Army Medical Center	Oahu			O	0.458152
Ab24TMC-S006	Tripler Army Medical Center	Oahu			O	0.0948371
Ab24TMC-S007	Tripler Army Medical Center	Oahu			O	0.0767006
Ab24TMC-S008	Tripler Army Medical Center	Oahu			O	0.0628103
Ab24TMC-S009	Tripler Army Medical Center	Oahu			O	0.110746
Ab24TMC-S010	Tripler Army Medical Center	Oahu			O	1.05463
Ab24TMC-S011	Tripler Army Medical Center	Oahu	O	0.0524042	O	4.70594
Ab24TMC-S012	Tripler Army Medical Center	Oahu			O	0.233578
Ab24TMC-S013	Tripler Army Medical Center	Oahu			O	0.0726042
Ab24TMC-S014	Tripler Army Medical Center	Oahu			O	0.560852
Ab24TMC-S015	Tripler Army Medical Center	Oahu			O	0.0996315
Ab24TMC-S016	Tripler Army Medical Center	Oahu			O	1.59091
Ab24TMC-W001	Tripler Army Medical Center	Oahu			O	0.24266
Ab24TMC-W002	Tripler Army Medical Center	Oahu			O	0.114609
Ab24TMC-W003	Tripler Army Medical Center	Oahu			O	0.22536
Ab24TMC-W004	Tripler Army Medical Center	Oahu			O	0.715846
Ab24TMC-W005	Tripler Army Medical Center	Oahu			O	0.249286
Ab24TMC-W006	Tripler Army Medical Center	Oahu			O	0.178201
Ab24TMC-W007	Tripler Army Medical Center	Oahu			O	0.212411
Ab24TMC-W008	Tripler Army Medical Center	Oahu			O	0.0799834
Ab24TMC-W009	Tripler Army Medical Center	Oahu			O	0.243596
Ab24TMC-W010	Tripler Army Medical Center	Oahu			O	0.302853
Ab24TMC-W011	Tripler Army Medical Center	Oahu	O	0.0263058	O	0.416177
Ab24TMC-W012	Tripler Army Medical Center	Oahu			O	0.0930474
Ab24TMC-W013	Tripler Army Medical Center	Oahu	O	0.00447217	O	0.409854
Ab24TMC-W014	Tripler Army Medical Center	Oahu			O	0.316538
Ab24TMC-W015	Tripler Army Medical Center	Oahu	O	0.0237404	O	0.0639597
Ab24TMC-W016	Tripler Army Medical Center	Oahu	O	0.00434085	O	0.174158
Ab24TMC-W017	Tripler Army Medical Center	Oahu	O	0.0355011	O	1.53988
Ab24TMC-W018	Tripler Army Medical Center	Oahu	O	0.0577526	O	0.146379
Ab24TMC-W019	Tripler Army Medical Center	Oahu			O	0.169648
Ab24TMC-W020	Tripler Army Medical Center	Oahu			O	0.314606
Ab24TMC-W021	Tripler Army Medical Center	Oahu
Ab24TMC-W022	Tripler Army Medical Center	Oahu			O	0.150299
Ab24TMC-W023	Tripler Army Medical Center	Oahu			O	0.303341
Ab24TMC-W024	Tripler Army Medical Center	Oahu			O	0.0145661
Ab24TMC-W025	Tripler Army Medical Center	Oahu			O	0.0999432
Ab23WAAF001	Wheeler Army Airfield	Oahu			O	2.39903
Ab23WAAF002	Wheeler Army Airfield	Oahu	O	0.14727	O	2.29884
Ab23WAAF003	Wheeler Army Airfield	Oahu			O	1.28822
Ab23WAAF004	Wheeler Army Airfield	Oahu			O	1.24718
Ab23WAAF005	Wheeler Army Airfield	Oahu			O	0.103564
Ab23WAAF006	Wheeler Army Airfield	Oahu			O	0.200958
Ab23WAAF007	Wheeler Army Airfield	Oahu			O	0.47333
